# Supplementary material
Source: MDPI journal article supplement (https://www.mdpi.com/2411-5142/9/1/17)
Supplement: s1 [file s1]

**Table S1:** The shooting parameters in control and experimental groups in the four conditions, before and after the 4-week balance training (onB: on balance; noL: no load; offB: off balance; L: with load).

|                    | Before Training |             |             |             | After Training |               |              |               |
|--------------------|-----------------|-------------|-------------|-------------|----------------|---------------|--------------|---------------|
|                    | onB-noL         | onB-L       | offB-noL    | offB-L      | onB-noL        | onB-L         | offB-noL     | offB-L        |
| CONTROL GROUP      |                 |             |             |             |                |               |              |               |
| Hold (sec)         | 3,00 ± 0,81     | 3,27 ± 1,00 | 2,46 ± 0,48 | 2,34 ± 0,32 | 3,52 ± 1,44    | 4,13 ± 1,37   | 2,74 ± 1,12  | 2,72 ± 1,15   |
| Xdev (cm)          | 2,20 ± 0,57     | 2,58 ± 0,83 | 1,99 ± 0,45 | 3,08 ± 0,89 | 2,02 ± 0,42    | 2,34 ± 0,35   | 2,29 ± 0,52  | 2,99 ± 0,43   |
| Ydev (cm)          | 2,16 ± 0,44     | 2,63 ± 0,71 | 2,16 ± 0,32 | 3,28 ± 0,47 | 1,94 ± 0,67    | 2,36 ± 0,65   | 2,35 ± 0,70  | 2,74 ± 0,64   |
| Interval (sec)     | 5,82 ± 1,05     | 6,17 ± 1,30 | 4,93 ± 0,69 | 4,78 ± 0,38 | 6,61 ± 2,10    | 8,22 ± 1,32   | 6,52 ± 1,40  | 6,11 ± 1,16   |
| RTV (AU)           | 1,03 ± 0,10     | 0,99 ± 0,11 | 1,01 ± 0,10 | 1,02 ± 0,11 | 1,02 ± 0,08    | 1,01 ± 0,14   | 0,99 ± 0,11  | 0,99 ± 0,10   |
| EXPERIMENTAL GROUP |                 |             |             |             |                |               |              |               |
| Hold (sec)         | 2,70 ± 1,94     | 2,30 ± 2,67 | 2,23 ± 1,22 | 1,94 ± 0,72 | 4,55 ± 1,29#   | 5,17 ± 1,30#* | 4,08 ± 0,79# | 4,47 ± 1,44#* |
| Xdev (cm)          | 2,00 ± 0,47     | 2,78 ± 0,72 | 1,97 ± 0,35 | 2,91 ± 0,49 | 1,54 ± 0,38#   | 2,00 ± 0,44#  | 1,35 ± 0,58# | 2,29 ± 0,63#  |
| Ydev (cm)          | 2,01 ± 0,21     | 2,45 ± 0,26 | 2,17 ± 0,37 | 2,98 ± 0,65 | 1,00 ± 0,27#   | 1,45 ± 0,18#  | 1,23 ± 0,35# | 2,03 ± 0,59#  |
| Interval (sec)     | 8,14 ± 2,71     | 9,67 ± 3,12 | 7,18 ± 2,44 | 7,90 ± 2,21 | 8,95 ± 2,94    | 9,38 ± 1,49   | 7,97 ± 2,12  | 9,44 ± 2,82   |
| RTV (AU)           | 1,02 ± 0,10     | 1,07 ± 0,13 | 1,07 ± 0,14 | 1,00 ± 0,14 | 0,95 ± 0,04    | 0,97 ± 0,10   | 0,94 ± 0,12  | 0,93 ± 0,07   |

# significant differences after the training program,  $p < 0.01$ ; \* significant differences compared to no load conditions,  $p < 0.01$ .
